# Supplementary material
Source: publisher site journal article supplement (https://www.dovepress.com/get_supplementary_file.php?f=442487.docx)
Supplement: Supplementary file 1 [file get_supplementary_file.php]

**Supplementary Materials for**

**Pretreatment Non-invasive Biomarkers as Predictors to Estimate Portal Vein Tumor Thrombosis (PVTT) Risk and Long-term Survival in HBV-related Hepatocellular Carcinoma Patients without PVTT**

Bang Liu, Jia Liu, Xuan Mei, Zhi-Qiang Zhang, Jian Fang, Li-Li Zhou, Jiao-Long Zheng, Hai-Yan Lin, Xiu-Ling Zhu, Dong-Liang Li

Correspondence: Dong-Liang Li, Department of Hepatobiliary Disease, Fuzong Clinical Medical College of Fujian Medical University & 900TH Hospital of Joint Logistics Support Force, Fuzhou, 350025, People’s Republic of China, Email [ldliang900@163.com](mailto:ldliang900@163.com)

**This file includes:**

Figure S1 to S3

Table S1 and S2

**Figure S1-S3**

**Figure S1**

**
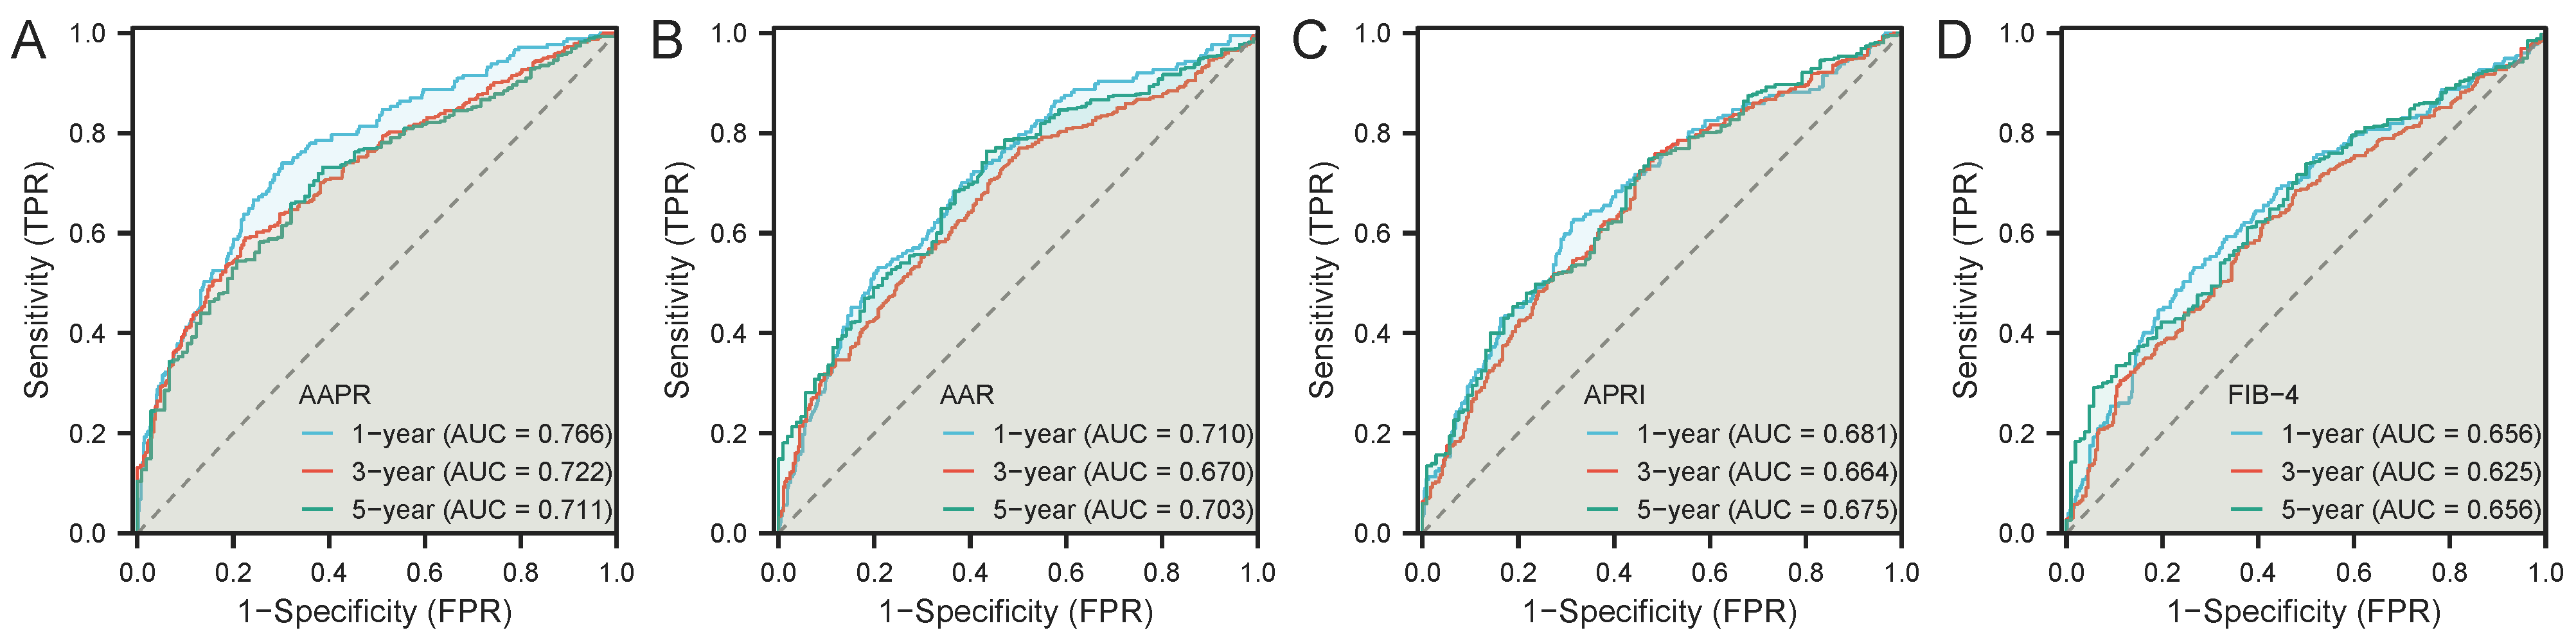
**

**Figure S2**

**
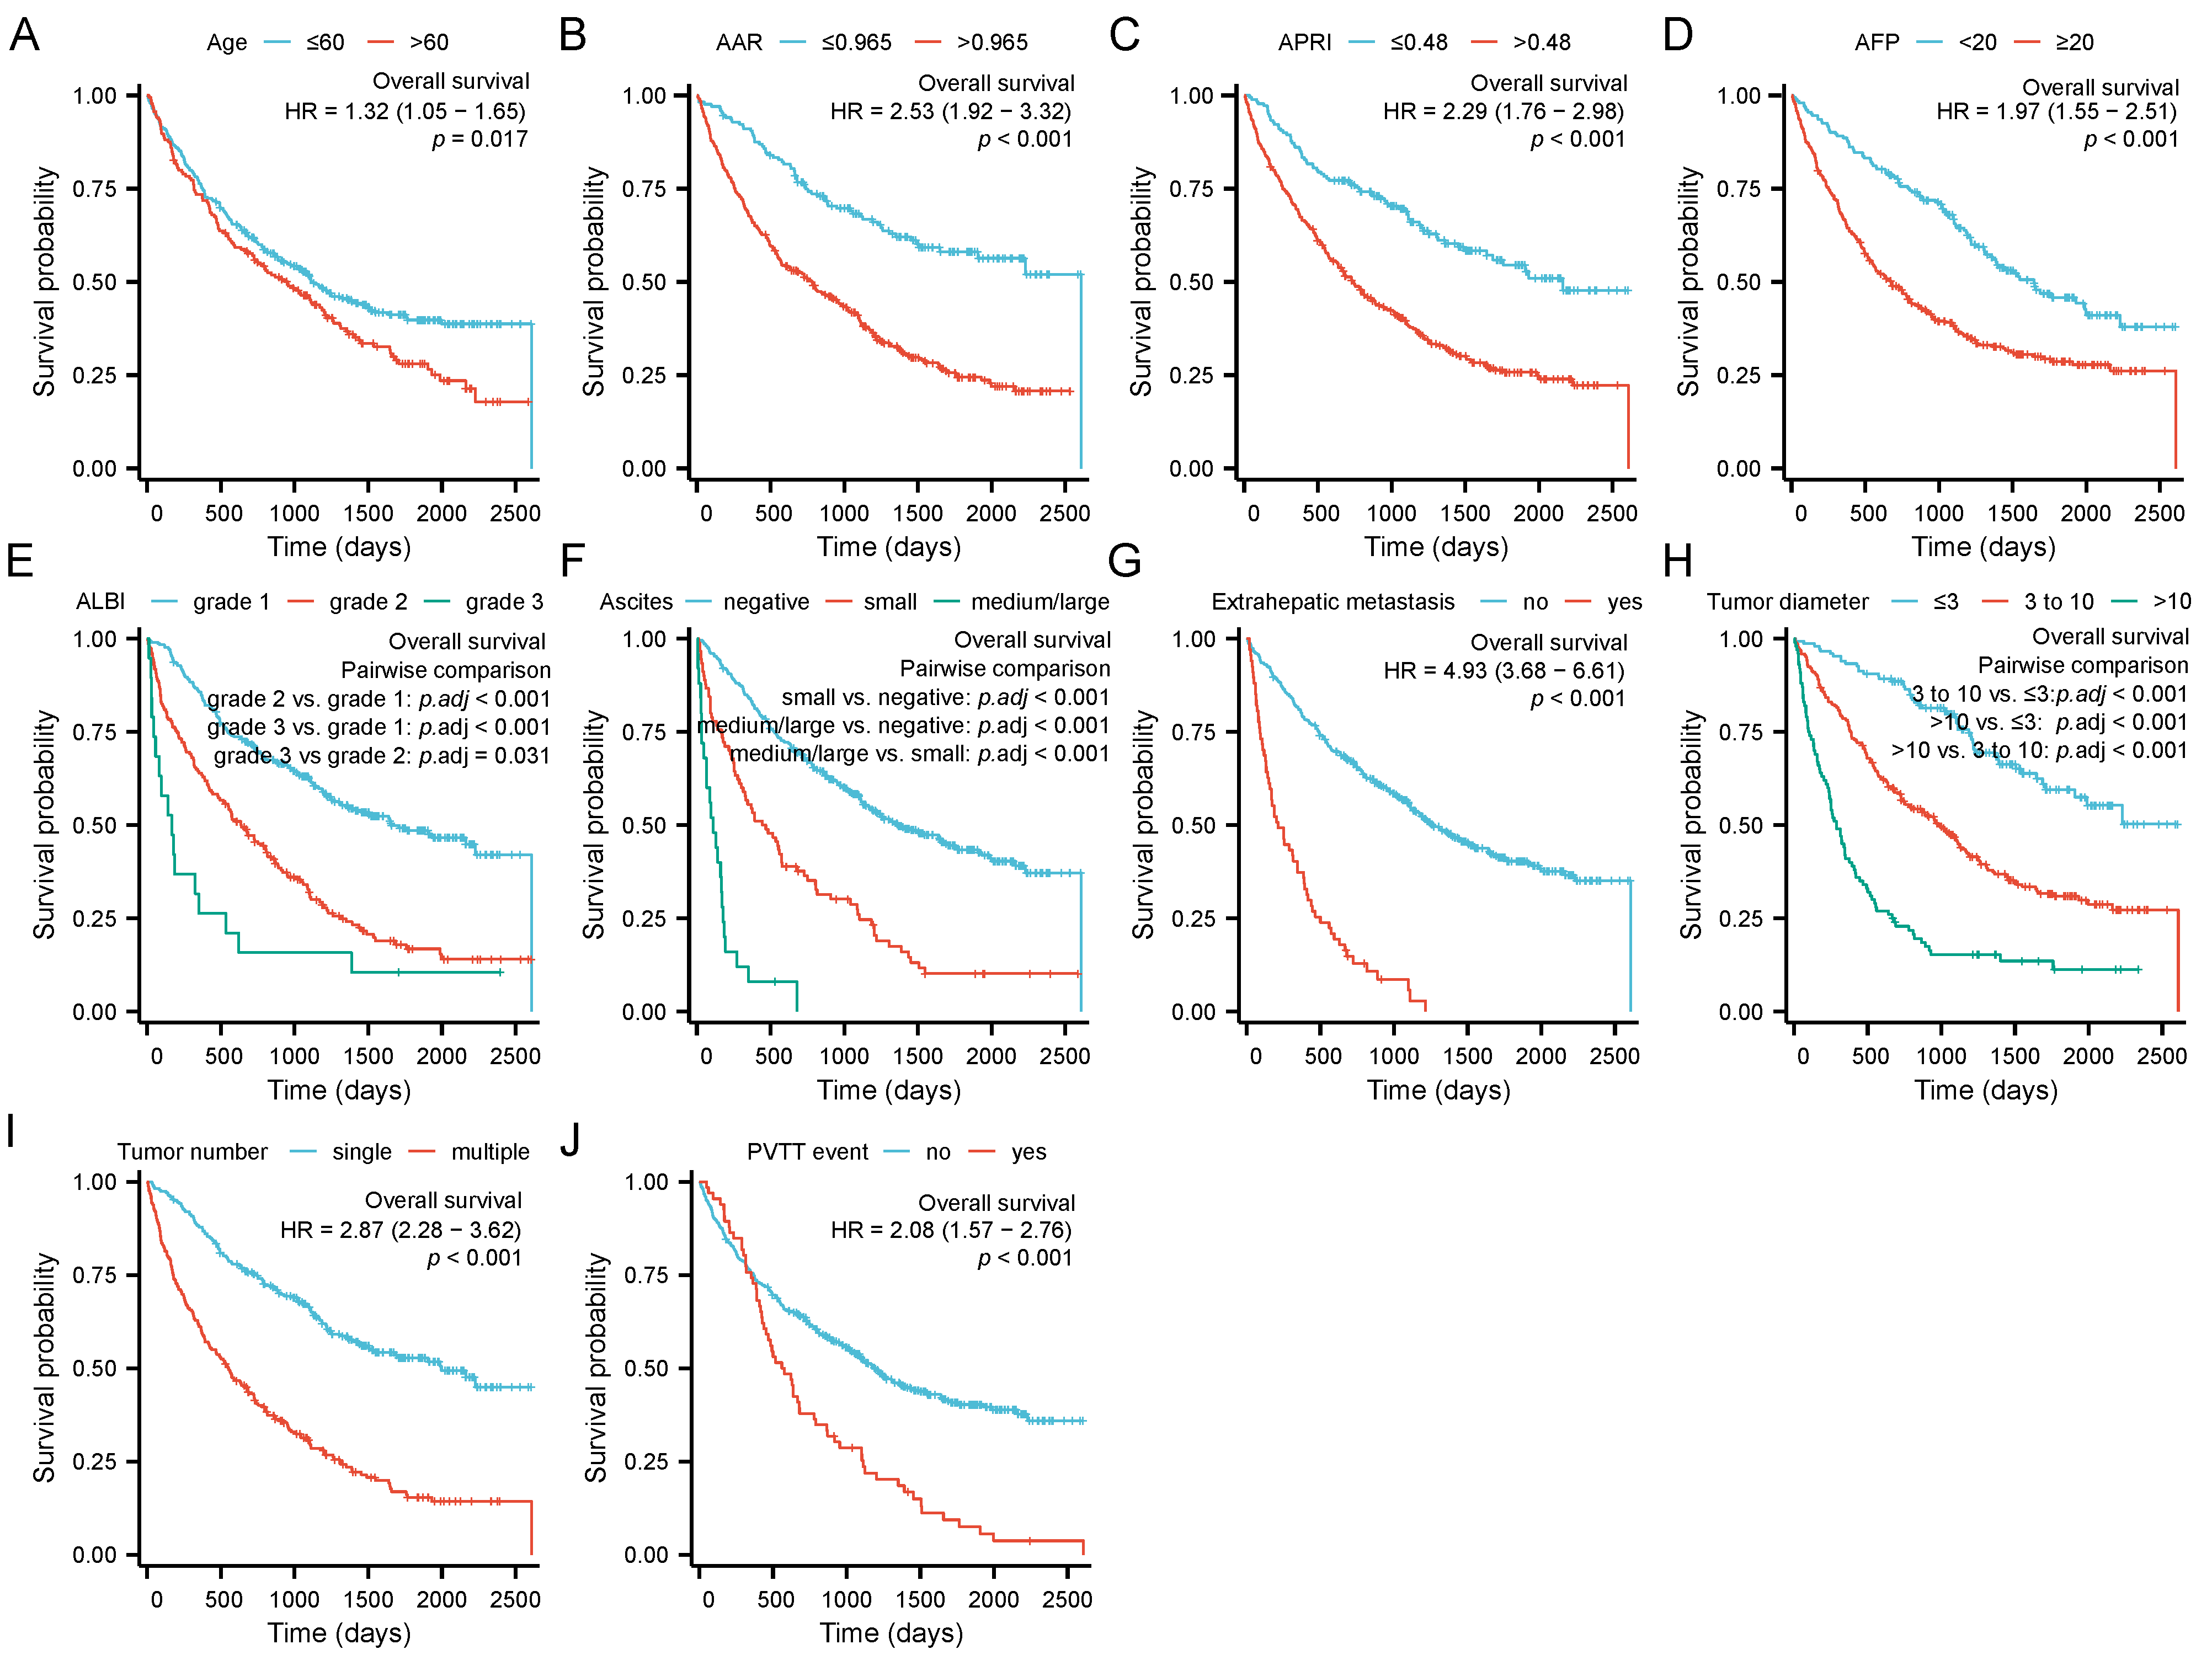
**

**Figure S3**

**
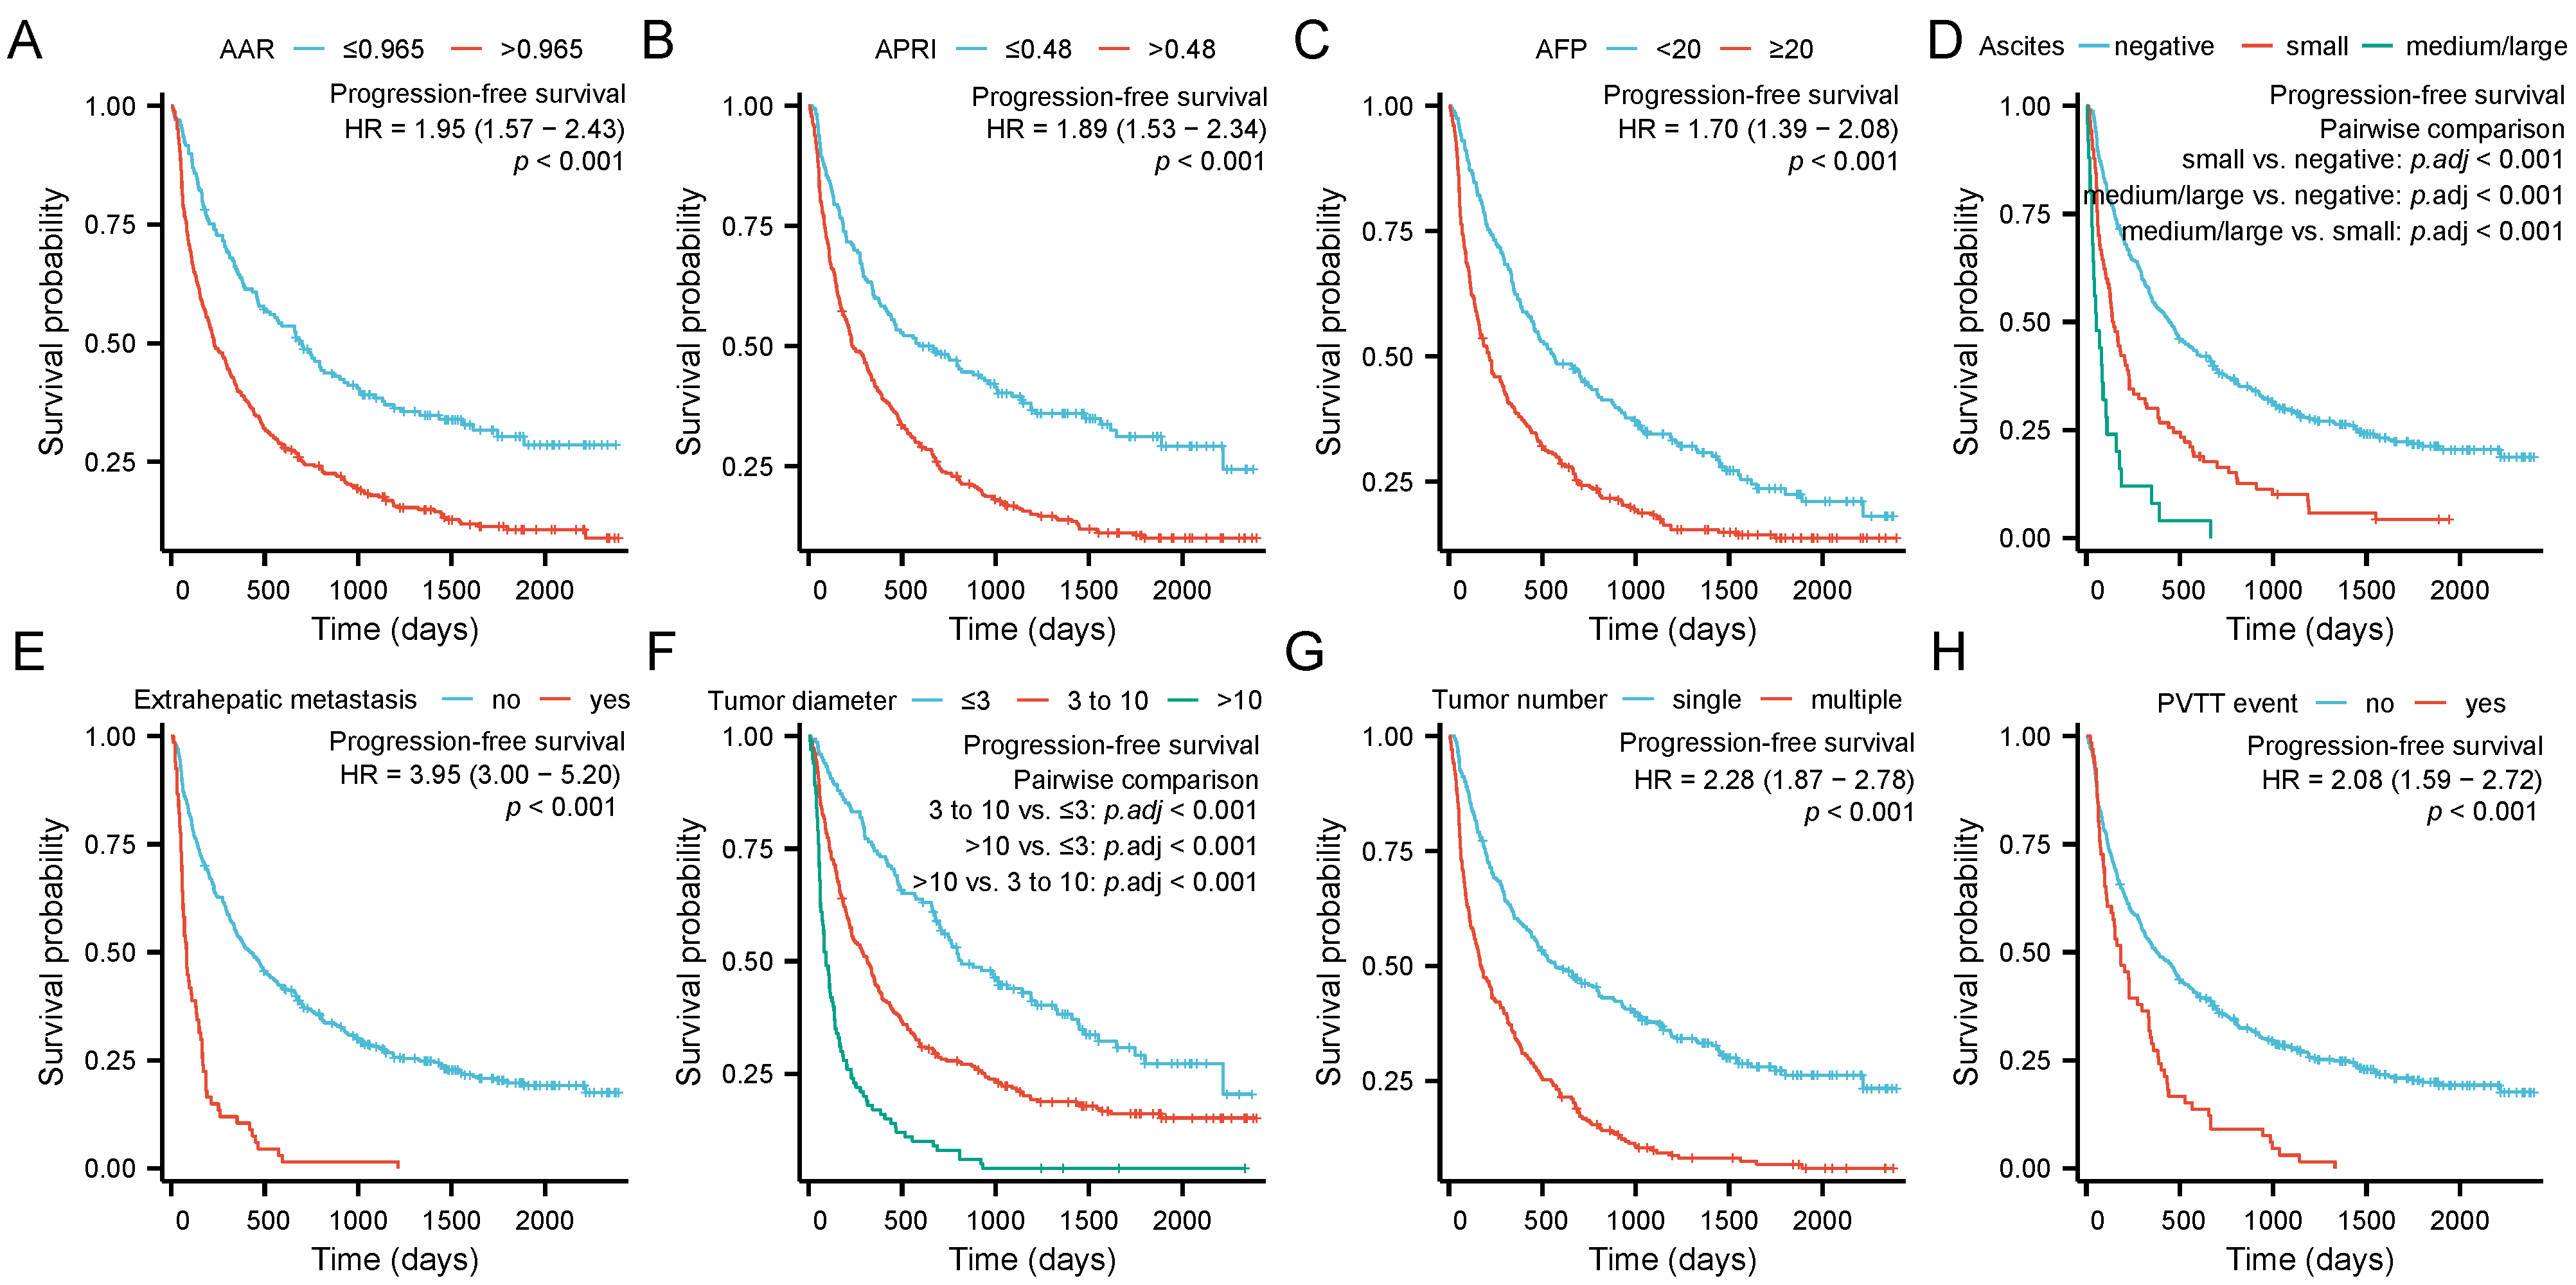
**

**Supplementary Figure Legends：**

**Figure S1:** Time‐dependent ROC curves of four noninvasive biomarkers, including AAPR (A), AAR (B), APRI (C), and FIB-4 (D) for predicting 1-,3-, and 5‐year OS in patients from our center.

**Abbreviations:** AAPR, albumin-to-alkaline phosphatase ratio; AUC, the area under the curve; AAR, aspartate aminotransferase-to-alanine aminotransferase ratio; APRI, aspartate aminotransferase -to-platelet ratio index; FIB-4, fibrosis-4 index.

**Figure S2:** The KM curves of ten independent risk factors, including age (A), AAR (B), APRI (C), AFP (D), ALBI grade (E), ascites (F), extrahepatic metastasis (G), tumor diameter (H), tumor number (I), and PVTT event (J), for the OS of HBV-related HCC patients without PVTT in the training cohort.

**Abbreviations:** HR, hazard ratio; AAR, aspartate aminotransferase-to-alanine aminotransferase ratio; APRI, aspartate aminotransferase -to-platelet ratio index; AFP, alpha-fetoprotein; ALBI, albumin-bilirubin; PVTT, portal vein tumor thrombosis.

**Figure S3:** The KM curves of eight independent risk factors, including AAR (A), APRI (B), AFP (C), ascites (D), extrahepatic metastasis (E), tumor diameter (F), tumor number (G), and PVTT event (H), for the PFS of HBV-related HCC patients without PVTT in the training cohort.

**Abbreviations:** AAR, aspartate aminotransferase-to-alanine aminotransferase ratio; HR, hazard ratio; APRI, aspartate aminotransferase -to-platelet ratio index; AFP, alpha-fetoprotein; PVTT, portal vein tumor thrombosis.

**Table S1 and S2**

**Table S1** Cox Regression Analysis for PVTT in the Entire Cohort

| **Characteristics** | **Total(N)** | **Univariate analysis** | | **Multivariate analysis** | |
| --- | --- | --- | --- | --- | --- |
| **Hazard ratio (95% CI)** | ***p* value** | **Hazard ratio (95% CI)** | ***p* value** |
| Gender, female vs male | 162/864 | 2.163 (1.167 - 4.009) | 0.014 | 2.171 (1.151 - 4.096) | 0.017 |
| Age, ≤60 vs. >60 | 646/380 | 0.809 (0.562 - 1.166) | 0.256 |  |  |
| AAPR, ≤0.49 vs. >0.49 | 649/377 | 0.298 (0.195 - 0.456) | < 0.001 | 0.428 (0.269 - 0.681) | < 0.001 |
| AAR, ≤0.965 vs. >0.965 | 339/687 | 1.510 (1.046 - 2.181) | 0.028 | 1.218 (0.798 - 1.859) | 0.361 |
| APRI, ≤0.48 vs. >0.48 | 369/657 | 2.575 (1.713 - 3.870) | < 0.001 | 2.644 (1.478 - 4.730) | 0.001 |
| FIB-4, ≤1.85 vs. >1.85 | 362/664 | 1.681 (1.157 - 2.443) | 0.006 | 0.708 (0.406 - 1.233) | 0.223 |
| AFP, <20 vs. ≥20 | 411/615 | 1.729 (1.209 - 2.471) | 0.003 | 1.382 (0.946 - 2.019) | 0.095 |
| HBV-DNA, log IU/ml |  |  |  |  |  |
| negative | 419 | Reference |  |  |  |
| <5 | 324 | 1.578 (1.046 - 2.382) | 0.030 | 1.185 (0.775 - 1.811) | 0.434 |
| ≥5 | 283 | 1.650 (1.087 - 2.503) | 0.019 | 1.042 (0.676 - 1.606) | 0.852 |
| ALBI grade |  |  |  |  |  |
| grade 1 | 611 | Reference |  | Reference |  |
| grade 2 | 374 | 1.577 (1.100 - 2.262) | 0.013 | 0.962 (0.639 - 1.449) | 0.853 |
| grade 3 | 41 | 4.379 (2.251 - 8.519) | < 0.001 | 2.190 (0.957 - 5.015) | 0.064 |
| Ascites |  |  |  |  |  |
| negative | 797 | Reference |  |  |  |
| small | 183 | 1.168 (0.715 - 1.907) | 0.534 | 0.617 (0.359 - 1.060) | 0.080 |
| medium / large | 46 | 5.110 (2.538 - 10.286) | < 0.001 | 2.036 (0.886 - 4.680) | 0.094 |
| Extrahepatic metastasis, no vs. yes | 894/132 | 4.751 (3.020 - 7.473) | < 0.001 | 3.016 (1.850 - 4.916) | < 0.001 |
| Tumor diameter, cm |  |  |  |  |  |
| ≤3 | 296 | Reference |  | Reference |  |
| 3 to 10 | 536 | 2.233 (1.440 - 3.463) | < 0.001 | 1.573 (0.983 - 2.516) | 0.059 |
| >10 | 194 | 3.437 (2.009 - 5.879) | < 0.001 | 1.631 (0.889 - 2.994) | 0.114 |
| Tumor number, single vs. multiple | 542/484 | 2.168 (1.538 - 3.055) | < 0.001 | 1.512 (1.040 - 2.199) | 0.030 |

**Abbreviations:** PVTT, portal vein tumor thrombosis; AAPR, albumin-to-alkaline phosphatase ratio; AAR, aspartate aminotransferase-to-alanine aminotransferase ratio; APRI, aspartate aminotransferase -to-platelet ratio index; FIB-4, fibrosis-4 index; AFP, alpha-fetoprotein; HBV-DNA, hepatitis B virus DNA; ALBI, albumin-bilirubin.

**Table S2** Cox Regression Analysis for OS and PFS in the Training Cohort

| **Characteristics** | **Total(N)** | **OS** | | | | **PFS** | | | |
| --- | --- | --- | --- | --- | --- | --- | --- | --- | --- |
| **Univariate analysis** | | **Multivariate analysis** | | **Univariate analysis** | | **Multivariate analysis** | |
| **Hazard ratio (95% CI)** | ***p* value** | **Hazard ratio (95% CI)** | ***p* value** | **Hazard ratio (95% CI)** | ***p* value** | **Hazard ratio (95% CI)** | ***p* value** |
| Gender, female vs male | 83/432 | 1.153 (0.843 - 1.578) | 0.373 |  |  | 1.109 (0.849 - 1.448) | 0.449 |  |  |
| Age, ≤60 vs. >60 | 330/185 | 1.319 (1.051 - 1.655) | 0.017 | 1.448 (1.117 - 1.878) | 0.005 | 1.143 (0.936 - 1.395) | 0.189 |  |  |
| AAPR, ≤0.49 vs. >0.49 | 320/195 | 0.376 (0.290 - 0.486) | < 0.001 | 0.996 (0.731 - 1.356) | 0.978 | 0.518 (0.420 - 0.638) | < 0.001 | 1.112 (0.860 - 1.439) | 0.418 |
| AAR, ≤0.965 vs. >0.965 | 169/346 | 2.526 (1.923 - 3.320) | < 0.001 | 1.932 (1.420 - 2.627) | < 0.001 | 1.951 (1.568 - 2.428) | < 0.001 | 1.662 (1.297 - 2.130) | < 0.001 |
| APRI, ≤0.48 vs. >0.48 | 180/335 | 2.291 (1.761 - 2.981) | < 0.001 | 1.651 (1.122 - 2.430) | 0.011 | 1.891 (1.526 - 2.345) | < 0.001 | 1.489 (1.085 - 2.043) | 0.014 |
| FIB-4, ≤1.85 vs. >1.85 | 183/332 | 2.085 (1.611 - 2.700) | < 0.001 | 0.913 (0.621 - 1.341) | 0.642 | 1.640 (1.329 - 2.023) | < 0.001 | 0.961 (0.703 - 1.314) | 0.804 |
| AFP, <20 vs. ≥20 | 202/313 | 1.971 (1.549 - 2.507) | < 0.001 | 1.382 (1.068 - 1.788) | 0.014 | 1.700 (1.389 - 2.081) | < 0.001 | 1.267 (1.022 - 1.570) | 0.031 |
| HBV-DNA, log IU/ml |  |  |  |  |  |  |  |  |  |
| negative | 212 | Reference |  | Reference |  | Reference |  | Reference |  |
| <5 | 165 | 1.537 (1.176 - 2.010) | 0.002 | 1.019 (0.766 - 1.355) | 0.899 | 1.129 (0.897 - 1.422) | 0.302 | 0.863 (0.677 - 1.100) | 0.233 |
| ≥5 | 138 | 1.569 (1.188 - 2.071) | 0.001 | 1.007 (0.749 - 1.355) | 0.961 | 1.338 (1.056 - 1.696) | 0.016 | 0.992 (0.771 - 1.276) | 0.951 |
| ALBI grade |  |  |  | 1.204 (0.769 - 1.888) | 0.417 |  |  |  |  |
| grade 1 | 302 | Reference |  | Reference |  | Reference |  | Reference |  |
| grade 2 | 194 | 2.401 (1.904 - 3.027) | < 0.001 | 1.336 (1.021 - 1.748) | 0.034 | 1.948 (1.593 - 2.382) | < 0.001 | 1.153 (0.904 - 1.470) | 0.251 |
| grade 3 | 19 | 4.730 (2.855 - 7.836) | < 0.001 | 2.255 (1.256 - 4.049) | 0.006 | 3.070 (1.893 - 4.978) | < 0.001 | 1.593 (0.916 - 2.770) | 0.099 |
| Ascites |  |  |  |  |  |  |  |  |  |
| negative | 400 | Reference |  | Reference |  | Reference |  | Reference |  |
| small | 90 | 2.691 (2.065 - 3.507) | < 0.001 | 1.411 (1.044 - 1.907) | 0.025 | 2.095 (1.641 - 2.674) | < 0.001 | 1.256 (0.951 - 1.658) | 0.108 |
| medium / large | 25 | 11.904 (7.581 - 18.690) | < 0.001 | 5.183 (3.120 - 8.611) | < 0.001 | 5.367 (3.536 - 8.147) | < 0.001 | 2.851 (1.787 - 4.550) | < 0.001 |
| Extrahepatic metastasis, no vs. yes | 448/67 | 4.931 (3.677 - 6.612) | < 0.001 | 2.669 (1.930 - 3.689) | < 0.001 | 3.953 (3.002 - 5.204) | < 0.001 | 2.170 (1.614 - 2.918) | < 0.001 |
| Tumor diameter, cm |  |  |  |  |  |  |  |  |  |
| ≤3 | 149 | Reference |  | Reference |  | Reference |  | Reference |  |
| 3 to 10 | 266 | 2.489 (1.823 - 3.397) | < 0.001 | 1.834 (1.321 - 2.547) | < 0.001 | 1.862 (1.463 - 2.369) | < 0.001 | 1.429 (1.104 - 1.849) | 0.007 |
| >10 | 100 | 6.093 (4.297 - 8.639) | < 0.001 | 3.541 (2.344 - 5.348) | < 0.001 | 4.415 (3.304 - 5.899) | < 0.001 | 2.819 (2.013 - 3.948) | < 0.001 |
| Tumor number, single vs. multiple | 273/242 | 2.871 (2.278 - 3.619) | < 0.001 | 1.848 (1.429 - 2.390) | < 0.001 | 2.281 (1.873 - 2.779) | < 0.001 | 1.562 (1.251 - 1.952) | < 0.001 |
| PVTT event, no vs. yes | 449/66 | 2.084 (1.572 - 2.763) | < 0.001 | 1.605 (1.192 - 2.163) | 0.002 | 2.080 (1.591 - 2.719) | < 0.001 | 1.946 (1.466 - 2.582) | < 0.001 |

**Abbreviations:** OS, overall survival; PFS, progression-free survival; AAPR, albumin-to-alkaline phosphatase ratio; AAR, aspartate aminotransferase-to-alanine aminotransferase ratio; APRI, aspartate aminotransferase -to-platelet ratio index; FIB-4, fibrosis-4 index; AFP, alpha-fetoprotein; HBV-DNA, hepatitis B virus DNA; ALBI, albumin-bilirubin; PVTT, portal vein tumor thrombosis.
